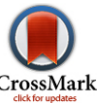

## Correction

# Correction: *De Novo* Transcriptome Assembly and Analyses of Gene Expression during Photomorphogenesis in Diploid Wheat *Triticum monococcum*

The PLOS ONE Staff

The affiliation for the last author is incorrect. Pankaj Jaiswal is not affiliated with #4 but with #3. The correct affiliations for this author are:

1 Department of Botany and Plant Pathology, Oregon State University, Corvallis, Oregon, United States of America.

3 Center for Genome Research and Biocomputing, Oregon State University, Corvallis, Oregon, United States of America.

## Reference

1. Fox SE, Geniza M, Hanumappa M, Naithani S, Sullivan C, et al. (2014) *De Novo* Transcriptome Assembly and Analyses of Gene Expression during Photomorphogenesis in Diploid Wheat *Triticum monococcum*. PLoS ONE 9(5): e96855. doi:10.1371/journal.pone.0096855

**Citation:** The PLOS ONE Staff (2014) Correction: *De Novo* Transcriptome Assembly and Analyses of Gene Expression during Photomorphogenesis in Diploid Wheat *Triticum monococcum*. PLoS ONE 9(8): e105275. doi:10.1371/journal.pone.0105275

**Published:** August 1, 2014

**Copyright:** © 2014 The PLOS ONE Staff. This is an open-access article distributed under the terms of the Creative Commons Attribution License, which permits unrestricted use, distribution, and reproduction in any medium, provided the original author and source are credited.
